# Supplementary material
Source: MDPI journal article supplement (https://www.mdpi.com/1424-8247/14/9/849)
Supplement: s1 [file s1]

# Novel Formulation of Eye Drops Containing Choline Salicylate and Hyaluronic Acid: Stability, Permeability, and Cytotoxicity Studies Using Alternative Ex Vivo and In Vitro Models

Katarzyna Barbara Wróblewska<sup>1\*</sup>, Bartłomiej Milanowski <sup>1,2</sup>, Małgorzata Kucińska <sup>3\*</sup>, Szymon Plewa <sup>4</sup>, Jolanta Długaszewska <sup>5</sup>, and Izabela Muszalska-Kolos <sup>6</sup>

<sup>1</sup> Department of Pharmaceutical Technology, Poznan University of Medical Sciences, Grunwaldzka 6, 60-780 Poznan, Poland, bmilan@ump.edu.pl

<sup>2</sup> GENERICA Pharmaceutical Lab, Regionalne Centrum Zdrowia Sp. z o.o., Na Kępie 3, 64-360 Zbąszyń, Poland, b.milanowski@rcz-zbaszyn.pl

<sup>3</sup> Department of Toxicology, Poznan University of Medical Sciences, Dojazd 30, 60-631 Poznan, Poland,

<sup>4</sup> Department of Inorganic and Analytical Chemistry, Poznan University of Medical Sciences, Grunwaldzka 6, 60-780 Poznan, Poland, splewa@ump.edu.pl

<sup>5</sup> Department of Genetics and Pharmaceutical Microbiology, Poznan University of Medical Sciences, Świącickiego 6, 60-781 Poznan, Poland, jdlugasz@ump.edu.pl

<sup>6</sup> Department of Pharmaceutical Chemistry, Poznan University of Medical Sciences, Grunwaldzka 6, 60-780 Poznan, Poland, imuszals@ump.edu.pl

\* Correspondence: kzajac@ump.edu.pl (K.B.W); kucinska@ump.edu.pl (M.K.)

## Supplementary Data

### Table of contents

|                                                                                                                                |   |
|--------------------------------------------------------------------------------------------------------------------------------|---|
| Figure S1. Cells morphology 24h after incubation with the tested solutions A-1, A-2 and C-(1-4), and appropriate controls..... | 3 |
| Figure S2. NRU staining 24h after incubation with the tested solutions A-1, A-2 and C-(1-4), and appropriate controls .....    | 4 |
| Figure S3. Cells morphology 24h after incubation with the tested solutions B-(1-6), and appropriate controls.....              | 5 |
| Figure S4. NRU staining 24h after incubation with the tested solutions B-(1-6), and appropriate controls.....                  | 6 |

### Abbreviations:

The following solutions were used to test the cytotoxic effect on the SIRC cell line:

Group A—sterile preparation (2% CS and 0.4% HA: A-1); control sample—sterile 0.4% HA solution (A-2).

Group B—sterile preparation (2% CS and 0.4% HA) stored for 6 months (40 °C/75% RH): in a glass bottle (B-1), in minims (B-2), and in minims and a package cardboard box (B-3); in uncontrolled conditions at 2–8 °C: in minims (B-4) and in a glass bottle (B-5); control sample—freshly prepared sterile eye drops containing CS (2%) and HA (0.4%) (B-6). The B1–3 solutions were colored to varying degrees.

Group C—HA solution (0.4%) after sterilization at: 105 ± 2 °C, 30 min (C-1); 121 ± 2 °C, 20 min (C-2); 134 ± 2 °C, 12 min (C-3); and control sample—nonsterile HA solution (0.4%) (C-4).

Sterile 0.9% NaCl was used as a control. Moreover, an additional control (cell culture medium only—M) was also used.

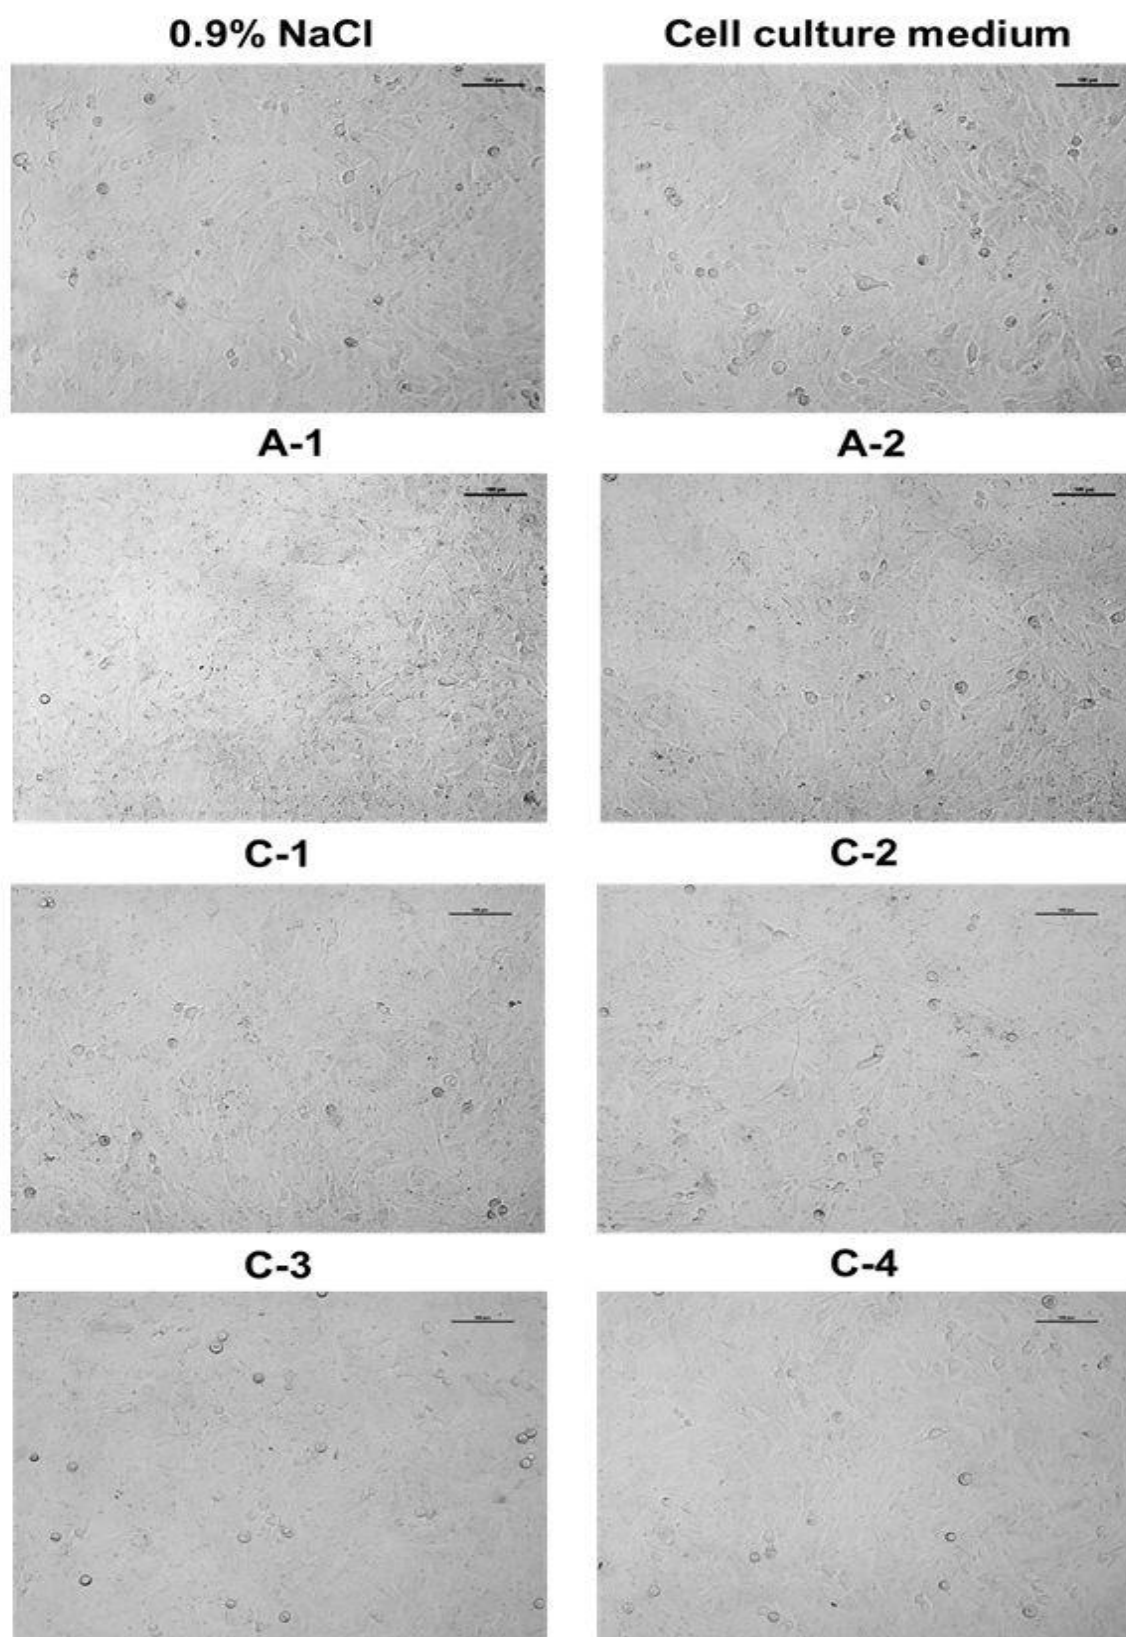

**Figure S1.** Cells morphology 24h after incubation with the tested solutions A-1, A-2 and C-(1-4), and appropriate controls. The images were taken with a DS-SMc digital camera attached to a Nikon Eclipse TS100 microscope. Scale bar corresponds to 100  $\mu\text{m}$ .

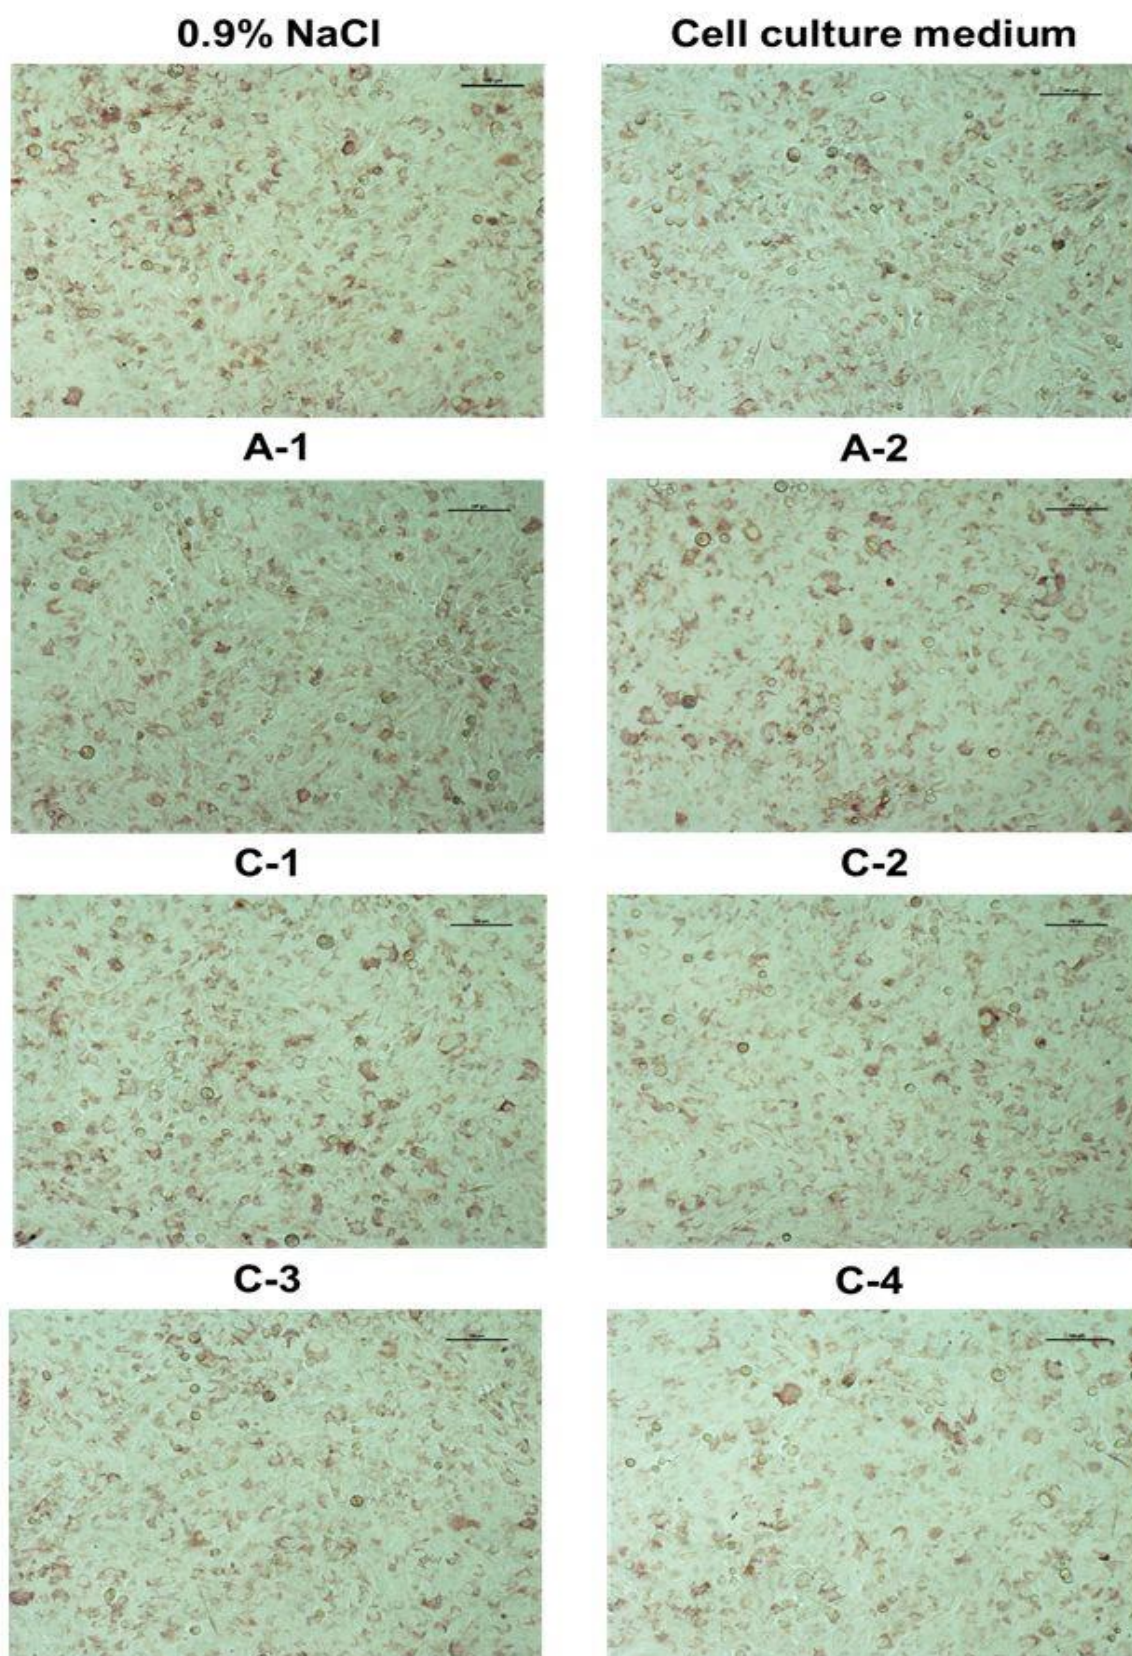

**Figure S2.** NRU staining 24h after incubation with the tested solutions A-1, A-2 and C-(1-4), and appropriate controls. The images were taken with a DS-SMc digital camera attached to a Nikon Eclipse TS100 microscope. Scale bar corresponds to 100  $\mu\text{m}$ .



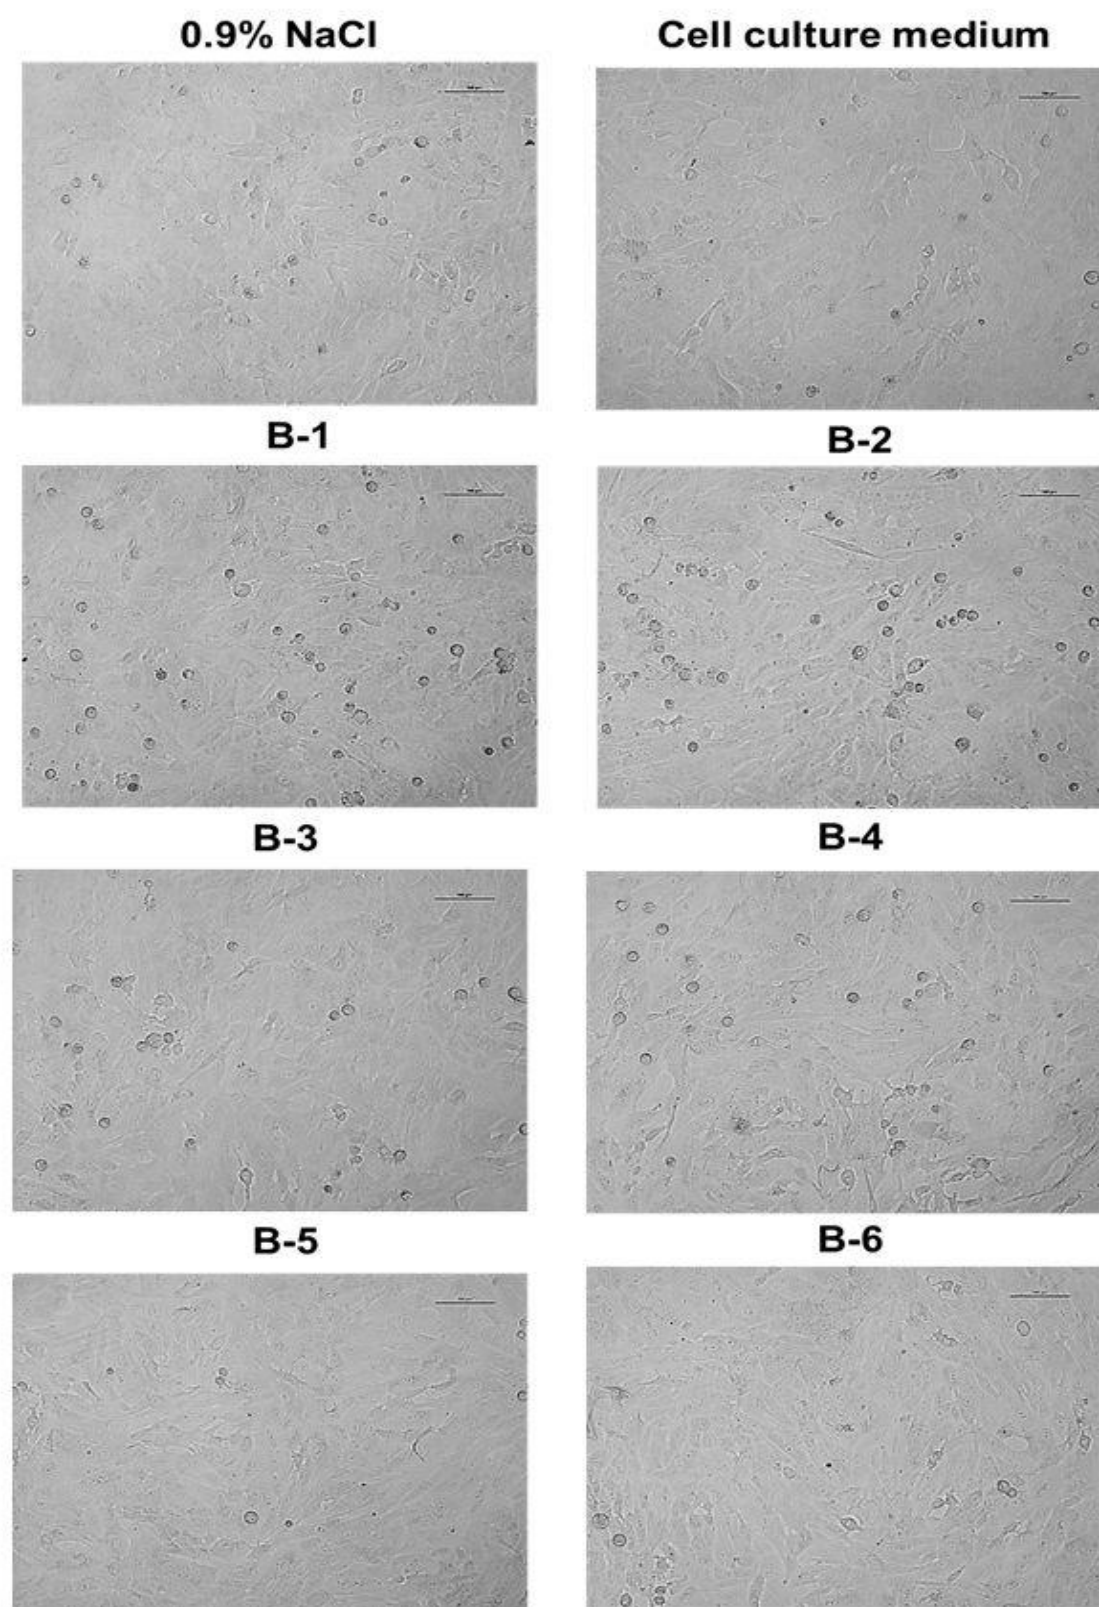

**Figure S3.** Cells morphology 24h after incubation with the tested solutions B-(1-6), and appropriate controls. The images were taken with a DS-SMc digital camera attached to a Nikon Eclipse TS100 microscope. Scale bar corresponds to 100  $\mu$ m.

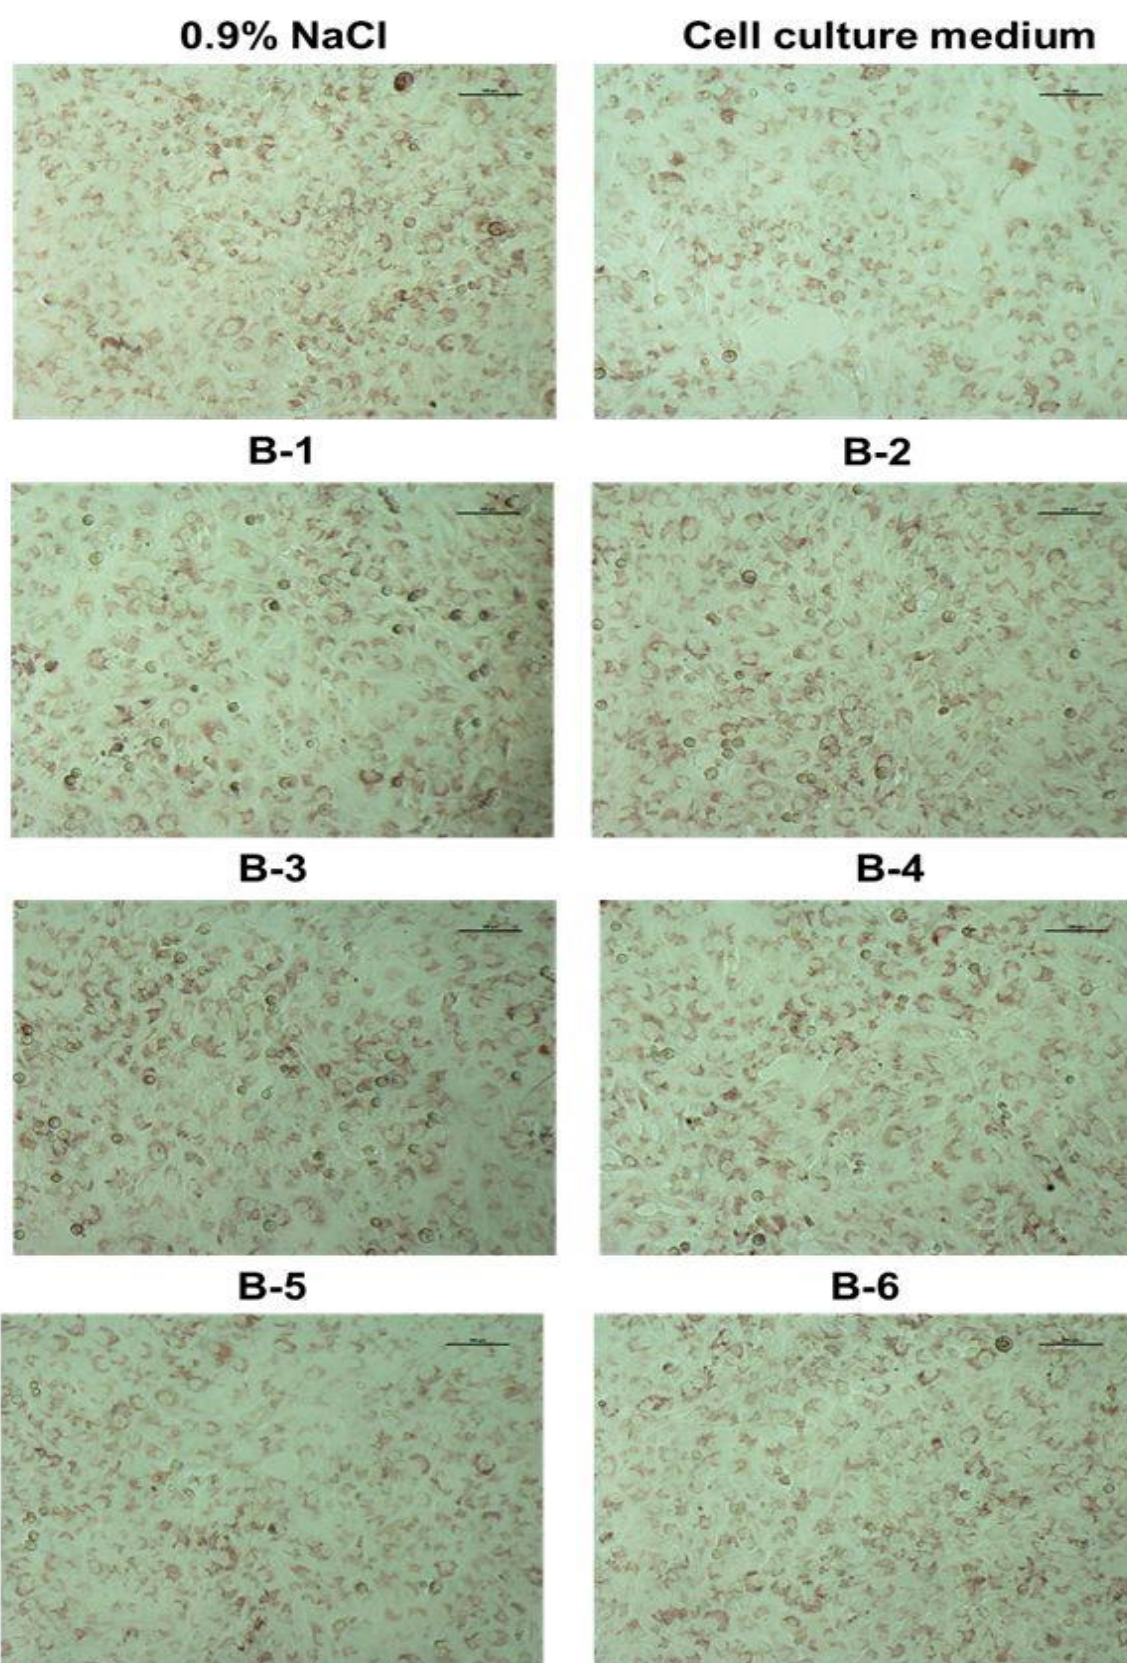

**Figure S4.** NRU staining 24h after incubation with the tested solutions B-(1-6), and appropriate controls. The images were taken with a DS-SMc digital camera attached to a Nikon Eclipse TS100 microscope. Scale bar corresponds to 100  $\mu$ m.
